# Supplementary material
Source: HighWire-hosted journal article supplement (https://oem.bmj.com/content/75/4/245)

Supplementary File 2.

Figure 1. Funnel plot for suicide ideation

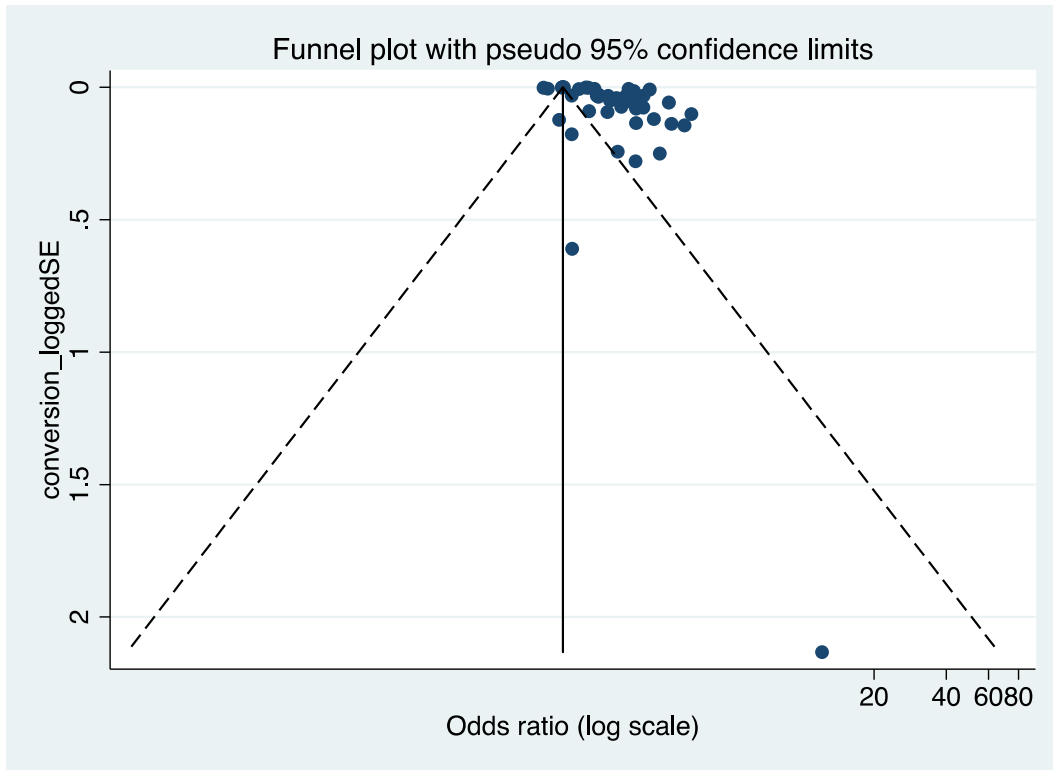

Figure 2. Funnel plot for suicide death

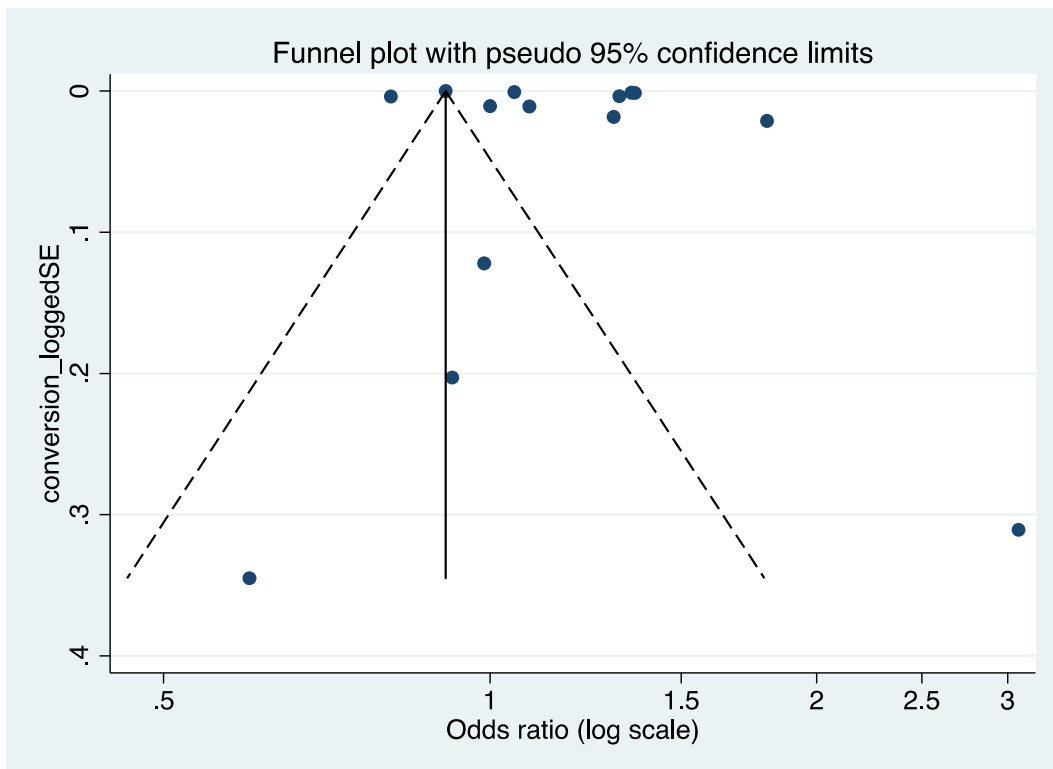

Supplement: inline-supplementary-material-2 [file inline-supplementary-material-2.pdf]
